# Supplementary material for: The Hub Line Location Problem
Source: Atypon-hosted journal article supplement (doi:10.1287/trsc.2014.0576), 2015-04-07
Supplement: trsc.2014.0576-sm-online_appendix.pdf [file trsc.2014.0576-sm-online_appendix.pdf]

## Online Supplement

### EC.1. Online Appendix C: Detailed Tables of Results.

**Table EC.1** Comparison of single-cut and multiple-cuts versions.

| $n$ | $p$ | $\alpha$ | $\vartheta$ | Bd-alg-1 |       | Bd-alg- $n$ |       | Bd-alg- $n^2$ |       | BD-cpx- $n^2$ |       |
|-----|-----|----------|-------------|----------|-------|-------------|-------|---------------|-------|---------------|-------|
|     |     |          |             | Time[s]  | #iter | Time[s]     | #iter | Time[s]       | #iter | Time[s]       | #iter |
| 10  | 5   | 0.2      | 0           | 37.05    | 158   | 5.19        | 27    | 2.68          | 12    | 2.65          | 13    |
| 10  | 5   | 0.2      | 0.1         | 27.09    | 135   | 4.86        | 26    | 1.92          | 11    | 1.85          | 11    |
| 10  | 5   | 0.2      | 0.25        | 23.7     | 121   | 3.63        | 24    | 1.89          | 13    | 3.11          | 17    |
| 10  | 5   | 0.5      | 0           | 28.16    | 141   | 0.96        | 13    | 0.41          | 7     | 1.61          | 12    |
| 10  | 5   | 0.5      | 0.1         | 21.79    | 128   | 1.19        | 15    | 0.51          | 9     | 1.37          | 11    |
| 10  | 5   | 0.5      | 0.25        | 32.06    | 152   | 0.86        | 14    | 0.3           | 8     | 0.93          | 12    |
| 10  | 5   | 0.8      | 0           | 51.93    | 197   | 0.3         | 11    | 0.12          | 7     | 0.53          | 9     |
| 10  | 5   | 0.8      | 0.1         | 40.1     | 187   | 0.36        | 11    | 0.13          | 6     | 0.42          | 10    |
| 10  | 5   | 0.8      | 0.25        | 47.71    | 210   | 0.16        | 10    | 0.17          | 9     | 0.15          | 10    |
| 10  | 8   | 0.2      | 0           | 17887    | 908   | 177.87      | 76    | 14.26         | 20    | 76.29         | 34    |
| 10  | 8   | 0.2      | 0.1         | 14253.8  | 811   | 102.34      | 66    | 9.18          | 18    | 56.11         | 28    |
| 10  | 8   | 0.2      | 0.25        | 24959.3  | 940   | 191.5       | 77    | 9.8           | 19    | 43.96         | 27    |
| 10  | 8   | 0.5      | 0           | 1174.28  | 347   | 3.51        | 18    | 0.63          | 8     | 6.1           | 16    |
| 10  | 8   | 0.5      | 0.1         | 3190.06  | 504   | 9.59        | 24    | 0.92          | 9     | 7.15          | 15    |
| 10  | 8   | 0.5      | 0.25        | 39991.8  | 1302  | 46.77       | 48    | 3.51          | 17    | 8.31          | 23    |
| 10  | 8   | 0.8      | 0           | 14565    | 1180  | 2.92        | 25    | 0.5           | 12    | 1.76          | 16    |
| 10  | 8   | 0.8      | 0.1         | 3664.37  | 691   | 5.94        | 28    | 0.35          | 10    | 0.82          | 13    |
| 10  | 8   | 0.8      | 0.25        | 404.57   | 357   | 14.11       | 43    | 0.23          | 11    | 0.44          | 13    |
| 20  | 5   | 0.2      | 0           | 28640.3  | 766   | 95.53       | 27    | 45.8          | 10    | 126.74        | 16    |
| 20  | 5   | 0.2      | 0.1         | 14658    | 591   | 78.72       | 26    | 27.91         | 11    | 86.87         | 17    |
| 20  | 5   | 0.2      | 0.25        | 15037.6  | 620   | 67.44       | 25    | 29.87         | 11    | 35.16         | 15    |
| 20  | 5   | 0.5      | 0           | time     | time  | 45.87       | 22    | 46.37         | 14    | 89.2          | 19    |
| 20  | 5   | 0.5      | 0.1         | time     | time  | 49.24       | 23    | 25.62         | 12    | 69.12         | 20    |
| 20  | 5   | 0.5      | 0.25        | time     | time  | 40.88       | 24    | 16.13         | 13    | 56.69         | 25    |
| 20  | 5   | 0.8      | 0           | time     | time  | 63.14       | 32    | 14.79         | 15    | 75.94         | 24    |
| 20  | 5   | 0.8      | 0.1         | time     | time  | 22.52       | 27    | 8.73          | 12    | 26.92         | 25    |
| 20  | 5   | 0.8      | 0.25        | time     | time  | 18.83       | 24    | 7.27          | 21    | 2.76          | 18    |
| 20  | 8   | 0.2      | 0           | time     | time  | time        | time  | 6280.76       | 36    | 32199.6       | 54    |
| 20  | 8   | 0.2      | 0.1         | time     | time  | time        | time  | 14014.8       | 53    | 71048         | 69    |
| 20  | 8   | 0.2      | 0.25        | time     | time  | time        | time  | 9927.78       | 46    | 37354.3       | 57    |
| 20  | 8   | 0.5      | 0           | time     | time  | 31577.6     | 118   | 2252.99       | 31    | 18167.4       | 51    |
| 20  | 8   | 0.5      | 0.1         | time     | time  | 14735.4     | 84    | 641.19        | 19    | 4961.26       | 34    |
| 20  | 8   | 0.5      | 0.25        | time     | time  | 9195.49     | 75    | 377.32        | 18    | 2094.48       | 30    |
| 20  | 8   | 0.8      | 0           | time     | time  | 477.66      | 36    | 49            | 15    | 521.49        | 25    |
| 20  | 8   | 0.8      | 0.1         | time     | time  | 339.94      | 35    | 19.93         | 15    | 109.11        | 19    |
| 20  | 8   | 0.8      | 0.25        | time     | time  | 1292.2      | 67    | 25.8          | 24    | 7.53          | 20    |
| 25  | 5   | 0.2      | 0           | time     | time  | 408.45      | 37    | 237.99        | 13    | 237.12        | 17    |
| 25  | 5   | 0.2      | 0.1         | time     | time  | 250.25      | 30    | 120.97        | 12    | 210.7         | 18    |
| 25  | 5   | 0.2      | 0.25        | time     | time  | 460.88      | 38    | 192.87        | 15    | 229.74        | 20    |
| 25  | 5   | 0.5      | 0           | time     | time  | 274.18      | 32    | 191.27        | 15    | 815.25        | 23    |
| 25  | 5   | 0.5      | 0.1         | time     | time  | 153.86      | 29    | 108.21        | 14    | 672.49        | 26    |
| 25  | 5   | 0.5      | 0.25        | time     | time  | 168.51      | 34    | 176.96        | 20    | 334.25        | 31    |
| 25  | 5   | 0.8      | 0           | time     | time  | 251.4       | 37    | 53.65         | 14    | 254.53        | 22    |
| 25  | 5   | 0.8      | 0.1         | time     | time  | 176.35      | 39    | 62.6          | 18    | 72.93         | 21    |
| 25  | 5   | 0.8      | 0.25        | time     | time  | 44.5        | 30    | 40.87         | 19    | 3.89          | 13    |

time: 24h time limit exceeded.

Table EC.2 Comparison of single-cut and multiple-cuts versions.

| $n$ | $p$ | $\alpha$ | $\vartheta$ | Bd- $\text{alg-1}$ |       | Bd- $\text{alg-}n$ |       | Bd- $\text{alg-}n^2$ |       | BD- $\text{cpx-}n^2$ |       |
|-----|-----|----------|-------------|--------------------|-------|--------------------|-------|----------------------|-------|----------------------|-------|
|     |     |          |             | Time[s]            | #iter | Time[s]            | #iter | Time[s]              | #iter | Time[s]              | #iter |
| 25  | 8   | 0.2      | 0           | time               | time  | time               | time  | 33540.4              | 43    | time                 | time  |
| 25  | 8   | 0.2      | 0.1         | time               | time  | time               | time  | time                 | time  | time                 | time  |
| 25  | 8   | 0.2      | 0.25        | time               | time  | time               | time  | time                 | time  | time                 | time  |
| 25  | 8   | 0.5      | 0           | time               | time  | time               | time  | 9007.69              | 24    | time                 | time  |
| 25  | 8   | 0.5      | 0.1         | time               | time  | time               | time  | 16808.6              | 32    | time                 | time  |
| 25  | 8   | 0.5      | 0.25        | time               | time  | time               | time  | 7814.53              | 29    | 52320.3              | 52    |
| 25  | 8   | 0.8      | 0           | time               | time  | 5928.37            | 55    | 278.08               | 19    | 7216.45              | 33    |
| 25  | 8   | 0.8      | 0.1         | time               | time  | 4892.85            | 57    | 232.29               | 20    | 1293.48              | 28    |
| 25  | 8   | 0.8      | 0.25        | time               | time  | 4955.26            | 65    | 154.78               | 29    | 12.97                | 18    |
| 40  | 5   | 0.2      | 0           | time               | time  | 18244.9            | 58    | 5348.35              | 15    | 14063                | 23    |
| 40  | 5   | 0.2      | 0.1         | time               | time  | 3405.17            | 32    | 1356.68              | 11    | 2825.61              | 16    |
| 40  | 5   | 0.2      | 0.25        | time               | time  | 5492.97            | 40    | 1117.64              | 12    | 1903.08              | 17    |
| 40  | 5   | 0.5      | 0           | time               | time  | 15022.4            | 53    | 14762.4              | 21    | 81331                | 35    |
| 40  | 5   | 0.5      | 0.1         | time               | time  | 3182.6             | 36    | 3626.68              | 19    | 7309.98              | 21    |
| 40  | 5   | 0.5      | 0.25        | time               | time  | 923.64             | 27    | 1381.65              | 17    | 1323.42              | 19    |
| 40  | 5   | 0.8      | 0           | time               | time  | 14174.1            | 65    | 4380.85              | 22    | 26201.7              | 30    |
| 40  | 5   | 0.8      | 0.1         | time               | time  | 4714.1             | 50    | 2224.42              | 23    | 1046.16              | 22    |
| 40  | 5   | 0.8      | 0.25        | time               | time  | 1898.17            | 45    | 528.25               | 20    | 21.4                 | 13    |
| 40  | 8   | 0.2      | 0           | time               | time  | time               | time  | time                 | time  | time                 | time  |
| 40  | 8   | 0.2      | 0.1         | time               | time  | time               | time  | time                 | time  | time                 | time  |
| 40  | 8   | 0.2      | 0.25        | time               | time  | time               | time  | time                 | time  | time                 | time  |
| 40  | 8   | 0.5      | 0           | time               | time  | time               | time  | time                 | time  | time                 | time  |
| 40  | 8   | 0.5      | 0.1         | time               | time  | time               | time  | time                 | time  | time                 | time  |
| 40  | 8   | 0.5      | 0.25        | time               | time  | time               | time  | time                 | time  | time                 | time  |
| 40  | 8   | 0.8      | 0           | time               | time  | time               | time  | time                 | time  | time                 | time  |
| 40  | 8   | 0.8      | 0.1         | time               | time  | time               | time  | 37241.8              | 29    | time                 | time  |
| 40  | 8   | 0.8      | 0.25        | time               | time  | time               | time  | 35412.9              | 63    | 10088.1              | 69    |
| 50  | 5   | 0.2      | 0           | time               | time  | 63190.1            | 60    | 26309.4              | 17    | 81005.1              | 30    |
| 50  | 5   | 0.2      | 0.1         | time               | time  | 12734.1            | 36    | 16284.5              | 14    | 16167                | 23    |
| 50  | 5   | 0.2      | 0.25        | time               | time  | 11811.2            | 38    | 8080.01              | 13    | 7792.48              | 19    |
| 50  | 5   | 0.5      | 0           | time               | time  | 57596.5            | 61    | 74491.5              | 24    | time                 | time  |
| 50  | 5   | 0.5      | 0.1         | time               | time  | 23364.5            | 48    | 56032.4              | 25    | time                 | time  |
| 50  | 5   | 0.5      | 0.25        | time               | time  | 20103.7            | 64    | 28025.9              | 24    | 27551.6              | 30    |
| 50  | 5   | 0.8      | 0           | time               | time  | time               | time  | 63081.5              | 29    | time                 | time  |
| 50  | 5   | 0.8      | 0.1         | time               | time  | 34959.3            | 72    | 26246                | 30    | 10473.1              | 29    |
| 50  | 5   | 0.8      | 0.25        | time               | time  | 14348.5            | 72    | 9957.53              | 33    | 60.25                | 15    |
| 50  | 8   | 0.2      | 0           | time               | time  | time               | time  | time                 | time  | time                 | time  |
| 50  | 8   | 0.2      | 0.1         | time               | time  | time               | time  | time                 | time  | time                 | time  |
| 50  | 8   | 0.2      | 0.25        | time               | time  | time               | time  | time                 | time  | time                 | time  |
| 50  | 8   | 0.5      | 0           | time               | time  | time               | time  | time                 | time  | time                 | time  |
| 50  | 8   | 0.5      | 0.1         | time               | time  | time               | time  | time                 | time  | time                 | time  |
| 50  | 8   | 0.5      | 0.25        | time               | time  | time               | time  | time                 | time  | time                 | time  |
| 50  | 8   | 0.8      | 0           | time               | time  | time               | time  | time                 | time  | time                 | time  |
| 50  | 8   | 0.8      | 0.1         | time               | time  | time               | time  | time                 | time  | time                 | time  |
| 50  | 8   | 0.8      | 0.25        | time               | time  | time               | time  | 77492.5              | 45    | 3515.43              | 43    |

time: 24h time limit exceeded.

**Table EC.3** Comparison of a variant without filtering of cuts and two strategies of cut filtering.

| $n$ | $p$ | $\vartheta$ | $\alpha$ | BDCF    |       |      | BDCF1   |      |      | BDCF2   |       |      |
|-----|-----|-------------|----------|---------|-------|------|---------|------|------|---------|-------|------|
|     |     |             |          | Time[s] | #Cut  | #No  | Time[s] | #Cut | #No  | Time[s] | #Cut  | #No  |
| 10  | 5   | 0.2         | 0        | 0.29    | 990   | 1    | 0.3     | 914  | 1    | 0.27    | 983   | 1    |
| 10  | 5   | 0.2         | 0.1      | 0.32    | 945   | 1    | 0.32    | 912  | 1    | 0.31    | 912   | 1    |
| 10  | 5   | 0.2         | 0.25     | 0.38    | 1035  | 6    | 0.29    | 821  | 8    | 0.33    | 887   | 7    |
| 10  | 5   | 0.5         | 0        | 0.15    | 585   | 1    | 0.16    | 545  | 1    | 0.13    | 493   | 1    |
| 10  | 5   | 0.5         | 0.1      | 0.11    | 540   | 1    | 0.12    | 500  | 1    | 0.15    | 670   | 1    |
| 10  | 5   | 0.5         | 0.25     | 0.24    | 1215  | 4    | 0.21    | 790  | 3    | 0.24    | 771   | 3    |
| 10  | 5   | 0.8         | 0        | 0.08    | 450   | 1    | 0.09    | 434  | 1    | 0.1     | 540   | 1    |
| 10  | 5   | 0.8         | 0.1      | 0.1     | 675   | 1    | 0.1     | 576  | 1    | 0.12    | 636   | 1    |
| 10  | 5   | 0.8         | 0.25     | 0.09    | 540   | 1    | 0.07    | 310  | 1    | 0.1     | 478   | 1    |
| 10  | 8   | 0.2         | 0        | 0.85    | 1215  | 112  | 0.87    | 1260 | 135  | 1.06    | 1877  | 174  |
| 10  | 8   | 0.2         | 0.1      | 0.68    | 990   | 86   | 0.61    | 942  | 85   | 0.69    | 1137  | 88   |
| 10  | 8   | 0.2         | 0.25     | 1.41    | 1710  | 170  | 1.48    | 2023 | 229  | 0.99    | 1347  | 226  |
| 10  | 8   | 0.5         | 0        | 0.22    | 720   | 4    | 0.22    | 552  | 9    | 0.28    | 910   | 10   |
| 10  | 8   | 0.5         | 0.1      | 0.48    | 1170  | 69   | 0.37    | 806  | 36   | 0.38    | 749   | 55   |
| 10  | 8   | 0.5         | 0.25     | 0.68    | 1800  | 188  | 0.6     | 1176 | 230  | 0.51    | 1355  | 191  |
| 10  | 8   | 0.8         | 0        | 0.26    | 1305  | 67   | 0.23    | 741  | 32   | 0.2     | 685   | 43   |
| 10  | 8   | 0.8         | 0.1      | 0.24    | 1035  | 31   | 0.19    | 680  | 49   | 0.21    | 687   | 34   |
| 10  | 8   | 0.8         | 0.25     | 0.14    | 720   | 68   | 0.19    | 842  | 60   | 0.16    | 603   | 80   |
| 20  | 5   | 0.2         | 0        | 5.97    | 3990  | 8    | 4.15    | 3556 | 1    | 4.25    | 2580  | 4    |
| 20  | 5   | 0.2         | 0.1      | 3.74    | 3420  | 1    | 4.87    | 3517 | 4    | 4.05    | 3010  | 11   |
| 20  | 5   | 0.2         | 0.25     | 4.73    | 3420  | 1    | 3.82    | 3816 | 1    | 4.31    | 3897  | 17   |
| 20  | 5   | 0.5         | 0        | 2.19    | 3040  | 1    | 2.58    | 2650 | 1    | 2.53    | 3167  | 13   |
| 20  | 5   | 0.5         | 0.1      | 2.77    | 3990  | 1    | 2.61    | 3171 | 1    | 2.35    | 3305  | 1    |
| 20  | 5   | 0.5         | 0.25     | 8.42    | 7030  | 13   | 6.44    | 3981 | 7    | 6.34    | 3239  | 35   |
| 20  | 5   | 0.8         | 0        | 1.27    | 2660  | 1    | 1.63    | 2745 | 1    | 1.43    | 2129  | 1    |
| 20  | 5   | 0.8         | 0.1      | 1.79    | 3610  | 2    | 1.77    | 2658 | 2    | 1.26    | 1907  | 12   |
| 20  | 5   | 0.8         | 0.25     | 1.1     | 2660  | 1    | 1.24    | 1740 | 1    | 3.34    | 11042 | 645  |
| 20  | 8   | 0.2         | 0        | 46.64   | 7030  | 439  | 44.25   | 7168 | 516  | 32.36   | 6844  | 319  |
| 20  | 8   | 0.2         | 0.1      | 232.09  | 10640 | 2329 | 208.87  | 9440 | 3291 | 200.57  | 12276 | 3122 |
| 20  | 8   | 0.2         | 0.25     | 318.28  | 9500  | 4610 | 249.51  | 7613 | 4755 | 193.91  | 9255  | 4131 |
| 20  | 8   | 0.5         | 0        | 31.82   | 5320  | 433  | 22.98   | 4661 | 636  | 19.02   | 5086  | 500  |
| 20  | 8   | 0.5         | 0.1      | 21.82   | 4940  | 331  | 18.07   | 4736 | 447  | 14.42   | 5437  | 218  |
| 20  | 8   | 0.5         | 0.25     | 44.19   | 7030  | 322  | 19.51   | 5095 | 376  | 21.64   | 4388  | 610  |
| 20  | 8   | 0.8         | 0        | 3.09    | 3990  | 3    | 2.75    | 2997 | 3    | 2.38    | 2433  | 6    |
| 20  | 8   | 0.8         | 0.1      | 3.45    | 5320  | 4    | 2.67    | 3020 | 5    | 2.61    | 2720  | 5    |
| 20  | 8   | 0.8         | 0.25     | 2.04    | 3610  | 9    | 2.22    | 2094 | 10   | 2.08    | 1553  | 8    |
| 25  | 5   | 0.2         | 0        | 16.9    | 5400  | 1    | 11.85   | 5608 | 1    | 12.19   | 6604  | 1    |
| 25  | 5   | 0.2         | 0.1      | 13.47   | 6000  | 5    | 11.67   | 4977 | 6    | 12.6    | 7261  | 1    |
| 25  | 5   | 0.2         | 0.25     | 14.53   | 7200  | 1    | 14.19   | 5432 | 14   | 13.41   | 5499  | 3    |
| 25  | 5   | 0.5         | 0        | 8.2     | 6600  | 1    | 6.75    | 4941 | 12   | 7.3     | 5868  | 6    |
| 25  | 5   | 0.5         | 0.1      | 8.34    | 5400  | 1    | 6.02    | 4747 | 1    | 6.76    | 5284  | 1    |
| 25  | 5   | 0.5         | 0.25     | 34.81   | 10500 | 44   | 20.83   | 5731 | 49   | 20.64   | 6179  | 50   |
| 25  | 5   | 0.8         | 0        | 3.45    | 3600  | 1    | 2.68    | 3223 | 1    | 2.85    | 2918  | 6    |
| 25  | 5   | 0.8         | 0.1      | 3.51    | 3600  | 1    | 3.57    | 3884 | 1    | 3.64    | 3131  | 12   |
| 25  | 5   | 0.8         | 0.25     | 3.13    | 5700  | 3    | 3.2     | 3520 | 1    | 2.21    | 2421  | 5    |

time: 24h time limit exceeded.

Table EC.4 Comparison of a variant without filtering of cuts and two strategies of cut filtering.

| $n$ | $p$ | $\vartheta$ | $\alpha$ | BDCF    |       |      | BDCF1   |       |      | BDCF2   |       |      |
|-----|-----|-------------|----------|---------|-------|------|---------|-------|------|---------|-------|------|
|     |     |             |          | Time[s] | #Cut  | #No  | Time[s] | #Cut  | #No  | Time[s] | #Cut  | #No  |
| 25  | 8   | 0.2         | 0        | 278.71  | 13800 | 660  | 194.31  | 11428 | 941  | 132.5   | 9820  | 715  |
| 25  | 8   | 0.2         | 0.1      | 1624.79 | 14400 | 5426 | 848.47  | 13686 | 4113 | 884.7   | 10829 | 5760 |
| 25  | 8   | 0.2         | 0.25     | 1651.51 | 11400 | 7546 | 794.44  | 7976  | 6393 | 587.85  | 9228  | 6128 |
| 25  | 8   | 0.5         | 0        | 95.18   | 10800 | 465  | 27.16   | 5444  | 153  | 31.39   | 6211  | 229  |
| 25  | 8   | 0.5         | 0.1      | 278.95  | 12300 | 1383 | 191.72  | 13658 | 1374 | 101.17  | 8833  | 1186 |
| 25  | 8   | 0.5         | 0.25     | 418.98  | 12900 | 1920 | 187.18  | 8917  | 2125 | 195.06  | 10506 | 2977 |
| 25  | 8   | 0.8         | 0        | 8.88    | 7500  | 10   | 6.79    | 4205  | 15   | 6.47    | 3606  | 16   |
| 25  | 8   | 0.8         | 0.1      | 10.67   | 7500  | 11   | 10.84   | 6864  | 36   | 8.09    | 4510  | 15   |
| 25  | 8   | 0.8         | 0.25     | 4.57    | 6300  | 41   | 3.8     | 1942  | 22   | 3.23    | 1675  | 36   |
| 40  | 5   | 0.2         | 0        | 270.82  | 17940 | 25   | 221.75  | 19936 | 3    | 237.31  | 21919 | 31   |
| 40  | 5   | 0.2         | 0.1      | 122.05  | 19500 | 1    | 116.83  | 15868 | 1    | 160.98  | 16868 | 20   |
| 40  | 5   | 0.2         | 0.25     | 198.18  | 15600 | 42   | 164.38  | 16308 | 20   | 149.51  | 18351 | 1    |
| 40  | 5   | 0.5         | 0        | 112.69  | 17160 | 3    | 75.85   | 17821 | 1    | 91.03   | 20273 | 3    |
| 40  | 5   | 0.5         | 0.1      | 72.46   | 17160 | 1    | 65.44   | 14894 | 3    | 78.86   | 19646 | 43   |
| 40  | 5   | 0.5         | 0.25     | 72.31   | 15600 | 11   | 59.19   | 15357 | 15   | 50.33   | 18718 | 1    |
| 40  | 5   | 0.8         | 0        | 41.75   | 17160 | 1    | 26.41   | 11120 | 1    | 25.17   | 12603 | 1    |
| 40  | 5   | 0.8         | 0.1      | 59.13   | 14820 | 9    | 36.57   | 12747 | 1    | 37.7    | 15021 | 1    |
| 40  | 5   | 0.8         | 0.25     | 26.56   | 14820 | 1    | 20.13   | 9124  | 1    | 23.62   | 10714 | 1    |
| 40  | 8   | 0.2         | 0        | 7145.35 | 34320 | 528  | 1601.63 | 26279 | 341  | 2018.81 | 23237 | 590  |
| 40  | 8   | 0.2         | 0.1      | 2537.9  | 36660 | 199  | 979.26  | 23707 | 131  | 898.95  | 23812 | 137  |
| 40  | 8   | 0.2         | 0.25     | 8876.23 | 35880 | 1134 | 4658.36 | 30766 | 1351 | 3711.55 | 31801 | 1827 |
| 40  | 8   | 0.5         | 0        | 1006.54 | 22620 | 371  | 1458.75 | 27640 | 989  | 834.89  | 18044 | 688  |
| 40  | 8   | 0.5         | 0.1      | 2914.17 | 37440 | 1105 | 1217.35 | 24095 | 1220 | 1501.84 | 24424 | 1331 |
| 40  | 8   | 0.5         | 0.25     | 20172.4 | 41340 | 5539 | 5666.85 | 27415 | 4508 | 7843.22 | 41395 | 6117 |
| 40  | 8   | 0.8         | 0        | 292.88  | 23400 | 51   | 74.74   | 11811 | 108  | 95.71   | 12964 | 23   |
| 40  | 8   | 0.8         | 0.1      | 436.78  | 27300 | 185  | 153.09  | 12182 | 136  | 161.65  | 13803 | 193  |
| 40  | 8   | 0.8         | 0.25     | 213.07  | 28080 | 265  | 108.46  | 16338 | 289  | 109.22  | 18517 | 474  |
| 50  | 5   | 0.2         | 0        | 613.42  | 29400 | 1    | 596.79  | 26448 | 1    | 657.96  | 27134 | 1    |
| 50  | 5   | 0.2         | 0.1      | 468.11  | 25725 | 1    | 504.91  | 23640 | 5    | 550.45  | 25322 | 4    |
| 50  | 5   | 0.2         | 0.25     | 447.91  | 24500 | 1    | 468.2   | 22919 | 18   | 493.28  | 23131 | 1    |
| 50  | 5   | 0.5         | 0        | 365.71  | 33075 | 5    | 295.45  | 23240 | 62   | 322.53  | 23548 | 21   |
| 50  | 5   | 0.5         | 0.1      | 161.63  | 20825 | 1    | 178.11  | 17299 | 19   | 154.74  | 17835 | 1    |
| 50  | 5   | 0.5         | 0.25     | 211.08  | 33075 | 1    | 232.84  | 24937 | 2    | 220.67  | 23082 | 5    |
| 50  | 5   | 0.8         | 0        | 103.24  | 15925 | 23   | 96.27   | 19276 | 6    | 78.42   | 14282 | 15   |
| 50  | 5   | 0.8         | 0.1      | 95.24   | 19600 | 1    | 79.74   | 17606 | 1    | 103.96  | 19180 | 19   |
| 50  | 5   | 0.8         | 0.25     | 46.02   | 19600 | 1    | 41.16   | 10151 | 1    | 38.54   | 12423 | 63   |
| 50  | 8   | 0.2         | 0        | 23693.3 | 58800 | 389  | 3334.5  | 40074 | 131  | 3560.09 | 38701 | 104  |
| 50  | 8   | 0.2         | 0.1      | time    | time  | time | 33190.2 | 47404 | 2316 | 32423.9 | 60075 | 2139 |
| 50  | 8   | 0.2         | 0.25     | time    | time  | time | 60028.9 | 53881 | 8969 | 45321.1 | 68057 | 5759 |
| 50  | 8   | 0.5         | 0        | 13196.1 | 42875 | 603  | 2277.12 | 36836 | 602  | 1996.59 | 30812 | 648  |
| 50  | 8   | 0.5         | 0.1      | 54650   | 62475 | 3727 | 24490.4 | 44808 | 4319 | 16446.8 | 38795 | 4755 |
| 50  | 8   | 0.5         | 0.25     | time    | time  | time | 24486.2 | 48537 | 6042 | 14467.9 | 50192 | 6432 |
| 50  | 8   | 0.8         | 0        | 207.99  | 25725 | 11   | 134.04  | 15966 | 3    | 142.98  | 15966 | 14   |
| 50  | 8   | 0.8         | 0.1      | 1352.77 | 44100 | 110  | 577.35  | 30713 | 254  | 402.82  | 22741 | 124  |
| 50  | 8   | 0.8         | 0.25     | 182.76  | 40425 | 23   | 144.37  | 19024 | 251  | 120.08  | 14405 | 207  |

time: 24h time limit exceeded.

**Table EC.5** Comparison of three strategies for adding cuts in the B&B tree: only for integer solutions (BDC), for all integer solutions and fractional solutions at the root node (BDCFR) and for all integer and fractional solutions (BDCFA).

| $n$ | $p$ | $\vartheta$ | $\alpha$ | BDC     |       |       | BDCFR   |       |      | BDCFA   |       |     |
|-----|-----|-------------|----------|---------|-------|-------|---------|-------|------|---------|-------|-----|
|     |     |             |          | Time[s] | #Cut  | #No   | Time[s] | #Cut  | #No  | Time[s] | #Cut  | #No |
| 10  | 5   | 0.2         | 0        | 0.36    | 1261  | 239   | 0.27    | 983   | 1    | 0.24    | 983   | 1   |
| 10  | 5   | 0.2         | 0.1      | 0.24    | 1152  | 158   | 0.31    | 912   | 1    | 0.31    | 912   | 1   |
| 10  | 5   | 0.2         | 0.25     | 0.2     | 1286  | 78    | 0.33    | 887   | 7    | 0.39    | 927   | 3   |
| 10  | 5   | 0.5         | 0        | 0.17    | 1370  | 115   | 0.13    | 493   | 1    | 0.14    | 493   | 1   |
| 10  | 5   | 0.5         | 0.1      | 0.1     | 855   | 31    | 0.15    | 670   | 1    | 0.16    | 670   | 1   |
| 10  | 5   | 0.5         | 0.25     | 0.12    | 1083  | 73    | 0.24    | 771   | 3    | 0.26    | 772   | 2   |
| 10  | 5   | 0.8         | 0        | 0.09    | 875   | 31    | 0.1     | 540   | 1    | 0.1     | 540   | 1   |
| 10  | 5   | 0.8         | 0.1      | 0.09    | 899   | 86    | 0.12    | 636   | 1    | 0.12    | 636   | 1   |
| 10  | 5   | 0.8         | 0.25     | 0.09    | 927   | 45    | 0.1     | 478   | 1    | 0.11    | 478   | 1   |
| 10  | 8   | 0.2         | 0        | 1.15    | 2036  | 601   | 1.06    | 1877  | 174  | 8.42    | 5104  | 107 |
| 10  | 8   | 0.2         | 0.1      | 0.95    | 2006  | 463   | 0.69    | 1137  | 88   | 2.22    | 2240  | 31  |
| 10  | 8   | 0.2         | 0.25     | 2.37    | 1800  | 2059  | 0.99    | 1347  | 226  | 2.39    | 1939  | 44  |
| 10  | 8   | 0.5         | 0        | 0.21    | 949   | 171   | 0.28    | 910   | 10   | 0.29    | 929   | 3   |
| 10  | 8   | 0.5         | 0.1      | 0.37    | 1672  | 301   | 0.38    | 749   | 55   | 0.88    | 1069  | 23  |
| 10  | 8   | 0.5         | 0.25     | 0.74    | 2082  | 981   | 0.51    | 1355  | 191  | 1.77    | 1340  | 42  |
| 10  | 8   | 0.8         | 0        | 0.14    | 1064  | 161   | 0.2     | 685   | 43   | 0.58    | 718   | 21  |
| 10  | 8   | 0.8         | 0.1      | 0.18    | 1228  | 206   | 0.21    | 687   | 34   | 0.32    | 696   | 9   |
| 10  | 8   | 0.8         | 0.25     | 0.21    | 1345  | 378   | 0.16    | 603   | 80   | 0.53    | 492   | 34  |
| 20  | 5   | 0.2         | 0        | 5.66    | 5684  | 880   | 4.25    | 2580  | 4    | 4.5     | 2718  | 2   |
| 20  | 5   | 0.2         | 0.1      | 4.89    | 7505  | 253   | 4.05    | 3010  | 11   | 4.08    | 3180  | 2   |
| 20  | 5   | 0.2         | 0.25     | 3.25    | 5890  | 321   | 4.31    | 3897  | 17   | 4.18    | 4172  | 2   |
| 20  | 5   | 0.5         | 0        | 4.58    | 7352  | 633   | 2.53    | 3167  | 13   | 2.75    | 3416  | 2   |
| 20  | 5   | 0.5         | 0.1      | 4.36    | 7178  | 810   | 2.35    | 3305  | 1    | 2.27    | 3305  | 1   |
| 20  | 5   | 0.5         | 0.25     | 3.08    | 6788  | 557   | 6.34    | 3239  | 35   | 7.92    | 3375  | 6   |
| 20  | 5   | 0.8         | 0        | 4.87    | 11299 | 841   | 1.43    | 2129  | 1    | 1.46    | 2129  | 1   |
| 20  | 5   | 0.8         | 0.1      | 4.46    | 9767  | 1303  | 1.26    | 1907  | 12   | 1.72    | 2025  | 3   |
| 20  | 5   | 0.8         | 0.25     | 5.91    | 15854 | 1515  | 3.34    | 11042 | 645  | 1.43    | 2668  | 5   |
| 20  | 8   | 0.2         | 0        | 217.82  | 16327 | 10107 | 32.36   | 6844  | 319  | 182.47  | 16911 | 82  |
| 20  | 8   | 0.2         | 0.1      | 334.68  | 23589 | 14460 | 200.57  | 12276 | 3122 | 2802.68 | 66352 | 348 |
| 20  | 8   | 0.2         | 0.25     | 304.42  | 23537 | 14431 | 193.91  | 9255  | 4131 | 6997.9  | 96650 | 644 |
| 20  | 8   | 0.5         | 0        | 115.02  | 17822 | 8111  | 19.02   | 5086  | 500  | 67.07   | 10234 | 81  |
| 20  | 8   | 0.5         | 0.1      | 69.88   | 14899 | 9202  | 14.42   | 5437  | 218  | 29.64   | 5854  | 32  |
| 20  | 8   | 0.5         | 0.25     | 30.49   | 13833 | 2710  | 21.64   | 4388  | 610  | 34.81   | 5731  | 48  |
| 20  | 8   | 0.8         | 0        | 8.87    | 7049  | 1909  | 2.38    | 2433  | 6    | 3.02    | 2471  | 4   |
| 20  | 8   | 0.8         | 0.1      | 15.07   | 13506 | 1577  | 2.61    | 2720  | 5    | 3.74    | 2752  | 4   |
| 20  | 8   | 0.8         | 0.25     | 16.57   | 20390 | 8392  | 2.08    | 1553  | 8    | 3.12    | 1619  | 7   |
| 25  | 5   | 0.2         | 0        | 25.15   | 9858  | 1348  | 12.19   | 6604  | 1    | 14.66   | 6604  | 1   |
| 25  | 5   | 0.2         | 0.1      | 11.31   | 9337  | 431   | 12.6    | 7261  | 1    | 14.62   | 7261  | 1   |
| 25  | 5   | 0.2         | 0.25     | 13.79   | 12448 | 497   | 13.41   | 5499  | 3    | 16.38   | 5629  | 2   |
| 25  | 5   | 0.5         | 0        | 19.27   | 9173  | 1760  | 7.3     | 5868  | 6    | 7.68    | 6267  | 2   |
| 25  | 5   | 0.5         | 0.1      | 21.23   | 12181 | 741   | 6.76    | 5284  | 1    | 6.57    | 5284  | 1   |
| 25  | 5   | 0.5         | 0.25     | 15.87   | 15402 | 1328  | 20.64   | 6179  | 50   | 34.08   | 7115  | 15  |
| 25  | 5   | 0.8         | 0        | 19.82   | 15053 | 2848  | 2.85    | 2918  | 6    | 3.07    | 2979  | 2   |
| 25  | 5   | 0.8         | 0.1      | 26.5    | 23382 | 3094  | 3.64    | 3131  | 12   | 3.71    | 3188  | 2   |
| 25  | 5   | 0.8         | 0.25     | 23.78   | 33632 | 3102  | 2.21    | 2421  | 5    | 2.57    | 2429  | 3   |

time: 24h time limit exceeded.

**Table EC.6** Comparison of three strategies for adding cuts in the B&B tree: only for integer solutions (BDC), for all integer solutions and fractional solutions at the root node (BDCFR) and for all integer and fractional solutions (BDCFA).

| $n$ | $p$ | $\vartheta$ | $\alpha$ | BDC     |        |        | BDCFR   |       |      | BDCFA   |        |      |
|-----|-----|-------------|----------|---------|--------|--------|---------|-------|------|---------|--------|------|
|     |     |             |          | Time[s] | #Cut   | #No    | Time[s] | #Cut  | #No  | Time[s] | #Cut   | #No  |
| 25  | 8   | 0.2         | 0        | 871.68  | 34314  | 12170  | 132.5   | 9820  | 715  | 2422.3  | 53729  | 183  |
| 25  | 8   | 0.2         | 0.1      | 2454.49 | 41996  | 39951  | 884.7   | 10829 | 5760 | 5667.89 | 67895  | 378  |
| 25  | 8   | 0.2         | 0.25     | 2617.95 | 43273  | 36441  | 587.85  | 9228  | 6128 | 4305.17 | 58438  | 432  |
| 25  | 8   | 0.5         | 0        | 845.42  | 17570  | 26408  | 31.39   | 6211  | 229  | 251.19  | 15743  | 123  |
| 25  | 8   | 0.5         | 0.1      | 1148.15 | 27643  | 55044  | 101.17  | 8833  | 1186 | 364.86  | 19007  | 110  |
| 25  | 8   | 0.5         | 0.25     | 576.62  | 31215  | 37571  | 195.06  | 10506 | 2977 | 1484.67 | 30594  | 359  |
| 25  | 8   | 0.8         | 0        | 137.99  | 19638  | 17229  | 6.47    | 3606  | 16   | 9.32    | 3803   | 11   |
| 25  | 8   | 0.8         | 0.1      | 73.33   | 26939  | 8081   | 8.09    | 4510  | 15   | 11.18   | 4074   | 9    |
| 25  | 8   | 0.8         | 0.25     | 141.19  | 37456  | 29810  | 3.23    | 1675  | 36   | 6.5     | 1808   | 19   |
| 40  | 5   | 0.2         | 0        | 752.59  | 38736  | 4336   | 237.31  | 21919 | 31   | 216.35  | 22665  | 2    |
| 40  | 5   | 0.2         | 0.1      | 330.22  | 42149  | 1361   | 160.98  | 16868 | 20   | 165.73  | 18223  | 2    |
| 40  | 5   | 0.2         | 0.25     | 160.46  | 32492  | 1255   | 149.51  | 18351 | 1    | 146.47  | 18351  | 1    |
| 40  | 5   | 0.5         | 0        | 1157.8  | 45248  | 12879  | 91.03   | 20273 | 3    | 89.55   | 20882  | 3    |
| 40  | 5   | 0.5         | 0.1      | 358.51  | 46171  | 3780   | 78.86   | 19646 | 43   | 75.16   | 20944  | 2    |
| 40  | 5   | 0.5         | 0.25     | 132.26  | 37969  | 2277   | 50.33   | 18718 | 1    | 51.45   | 18718  | 1    |
| 40  | 5   | 0.8         | 0        | 415.92  | 62323  | 9028   | 25.17   | 12603 | 1    | 25.11   | 12603  | 1    |
| 40  | 5   | 0.8         | 0.1      | 145.78  | 52659  | 3639   | 37.7    | 15021 | 1    | 37.12   | 15021  | 1    |
| 40  | 5   | 0.8         | 0.25     | 242.87  | 141256 | 7431   | 23.62   | 10714 | 1    | 23.77   | 10714  | 1    |
| 40  | 8   | 0.2         | 0        | 28233.6 | 91072  | 30091  | 2018.81 | 23237 | 590  | 4798.21 | 41470  | 75   |
| 40  | 8   | 0.2         | 0.1      | 25035.5 | 108140 | 34331  | 898.95  | 23812 | 137  | 1287.42 | 25896  | 10   |
| 40  | 8   | 0.2         | 0.25     | 42454.5 | 93648  | 74207  | 3711.55 | 31801 | 1827 | 38429.9 | 116882 | 314  |
| 40  | 8   | 0.5         | 0        | 44103.1 | 77627  | 98921  | 834.89  | 18044 | 688  | 1340.8  | 30636  | 29   |
| 40  | 8   | 0.5         | 0.1      | 24220.4 | 91836  | 70077  | 1501.84 | 24424 | 1331 | 6882.92 | 48108  | 309  |
| 40  | 8   | 0.5         | 0.25     | 12972.4 | 115014 | 151458 | 7843.22 | 41395 | 6117 | 72772.5 | 96036  | 1056 |
| 40  | 8   | 0.8         | 0        | 10043.2 | 94801  | 68928  | 95.71   | 12964 | 23   | 114.64  | 13263  | 9    |
| 40  | 8   | 0.8         | 0.1      | 5122.28 | 90192  | 88275  | 161.65  | 13803 | 193  | 309.23  | 13431  | 31   |
| 40  | 8   | 0.8         | 0.25     | 5837.06 | 174987 | 184831 | 109.22  | 18517 | 474  | 292.82  | 12568  | 100  |
| 50  | 5   | 0.2         | 0        | 2106.62 | 74970  | 5447   | 657.96  | 27134 | 1    | 618.29  | 27134  | 1    |
| 50  | 5   | 0.2         | 0.1      | 1336.94 | 70488  | 3546   | 550.45  | 25322 | 4    | 504.8   | 26107  | 2    |
| 50  | 5   | 0.2         | 0.25     | 493.39  | 53979  | 1606   | 493.28  | 23131 | 1    | 435.01  | 23131  | 1    |
| 50  | 5   | 0.5         | 0        | 3986.35 | 82058  | 19623  | 322.53  | 23548 | 21   | 290.69  | 24662  | 2    |
| 50  | 5   | 0.5         | 0.1      | 1526.88 | 99633  | 5760   | 154.74  | 17835 | 1    | 149.75  | 17835  | 1    |
| 50  | 5   | 0.5         | 0.25     | 776.8   | 60604  | 6350   | 220.67  | 23082 | 5    | 228.27  | 23647  | 5    |
| 50  | 5   | 0.8         | 0        | 2439.55 | 94099  | 23729  | 78.42   | 14282 | 15   | 75.6    | 14779  | 2    |
| 50  | 5   | 0.8         | 0.1      | 1994.74 | 136131 | 21378  | 103.96  | 19180 | 19   | 94.91   | 19721  | 2    |
| 50  | 5   | 0.8         | 0.25     | 703.71  | 167829 | 15019  | 38.54   | 12423 | 63   | 44.73   | 11533  | 2    |
| 50  | 8   | 0.2         | 0        | time    | time   | time   | 3560.09 | 38701 | 104  | 4582.84 | 42865  | 16   |
| 50  | 8   | 0.2         | 0.1      | time    | time   | time   | 32423.9 | 60075 | 2139 | time    | time   | time |
| 50  | 8   | 0.2         | 0.25     | time    | time   | time   | 45321.1 | 68057 | 5759 | time    | time   | time |
| 50  | 8   | 0.5         | 0        | time    | time   | time   | 1996.59 | 30812 | 648  | 8537.87 | 46310  | 90   |
| 50  | 8   | 0.5         | 0.1      | time    | time   | time   | 16446.8 | 38795 | 4755 | time    | time   | time |
| 50  | 8   | 0.5         | 0.25     | time    | time   | time   | 14467.9 | 50192 | 6432 | time    | time   | time |
| 50  | 8   | 0.8         | 0        | 63116.7 | 177009 | 266421 | 142.98  | 15966 | 14   | 193.1   | 16095  | 9    |
| 50  | 8   | 0.8         | 0.1      | 38800.2 | 221718 | 265619 | 402.82  | 22741 | 124  | 830.06  | 26213  | 39   |
| 50  | 8   | 0.8         | 0.25     | 25845.2 | 234459 | 387056 | 120.08  | 14405 | 207  | 394.2   | 13857  | 54   |

time: 24h time limit exceeded.
